# Supplementary material for: One-Step Synthesis of Self-Stratification Core-Shell Latex for Antimicrobial Coating
Source: MDPI journal article supplement (doi:10.3390/molecules28062795), 2023-03-20
Supplement: s1 [file s1]

# One-Step Synthesis of Self-Stratification Core–Shell Latex for Antimicrobial Coating

Guanzhou Zhen <sup>1</sup>, Yuanchun Mu <sup>1,2,\*</sup>, Peichen Yuan <sup>1</sup>, Yankun Li <sup>1</sup> and Xiaoyu Li <sup>1,2,\*</sup>

<sup>1</sup> Beijing Engineering Research Center of Synthesis and Application of Waterborne Polymer, Beijing University of Chemical Technology, Beijing 100029, China

<sup>2</sup> State Key Laboratory of Organic-Inorganic Composite, Beijing University of Chemical Technology, Beijing 100029, China

\* Correspondence: 2021500068@mail.buct.edu.cn (Y.M.); lixy@mail.buct.edu.cn (X.L.)

## S1. Synthesis of QAS-BN homopolymer P(QAS-BN)

20. g of QAS-BN was dissolved in 80g of deionized water, added to a four-necked flask with nitrogen gas and heated to 87.5°C. Add 2 g of initiator AIBA and react under stirring condition for 4 h. The aqueous solution of P-QAS-BN was obtained. The aqueous solution of P(QAS-BN) was added to acetonitrile in the ratio of 1:10 and washed 3 times, filtered, and dried to obtain a white solid powder.

## S2. Control sample formulation in antiviral testing

### S2.1. Anti-microbial monomer synthesis method

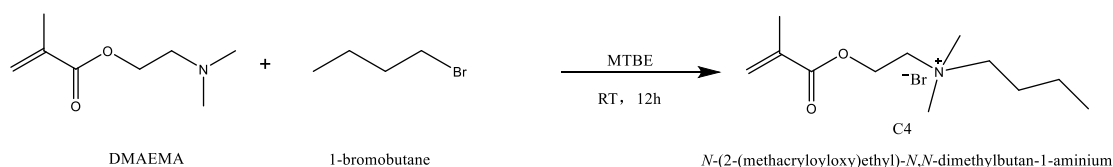

**Scheme S1.** Reaction equation for the synthesis of C4.

C4 was accomplished by the Hoffman alkylation reaction of 1-bromobutane with DMAEMA. The reaction equation is given in **Scheme S1**. Specifically, 1-bromobutane and DMAEMA were mixed in hexane in a 1:1 ratio and stirred to react fully, and the solid pre-product was obtained by filtration. Next, the product was washed using hexane and acetone and dried under a vacuum to get a solid white product. The <sup>1</sup>H NMR and IR spectra of the monomer are given in **Figure S1**.

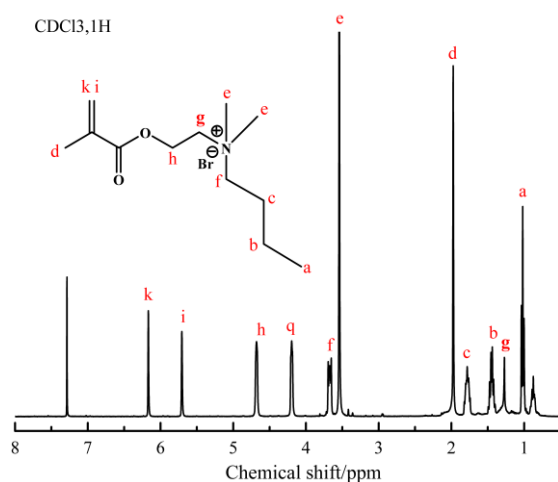

**Figure S1.**  $^1\text{H}$  NMR of C4 monomer.

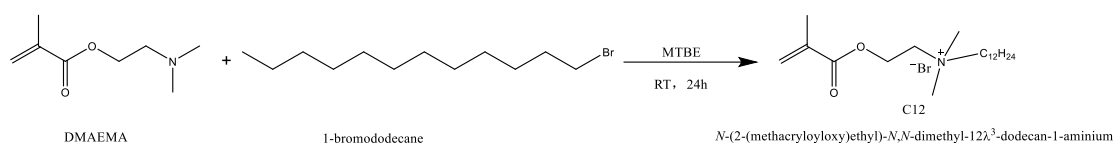

**Scheme S2.** Reaction equation for the synthesis of C12.

C12 was accomplished by the Hoffman alkylation reaction of Bromododecane with DMAEMA. The reaction equation is given in **Scheme S1**. Specifically, Bromododecane and DMAEMA were mixed in hexane in a 1:1 ratio and stirred to react fully, and the solid pre-product was obtained by filtration. Next, the product was washed using hexane and acetone and dried under a vacuum to get a solid white product. The  $^1\text{H}$  NMR and IR spectra of the monomer are given in **Figure S2**.

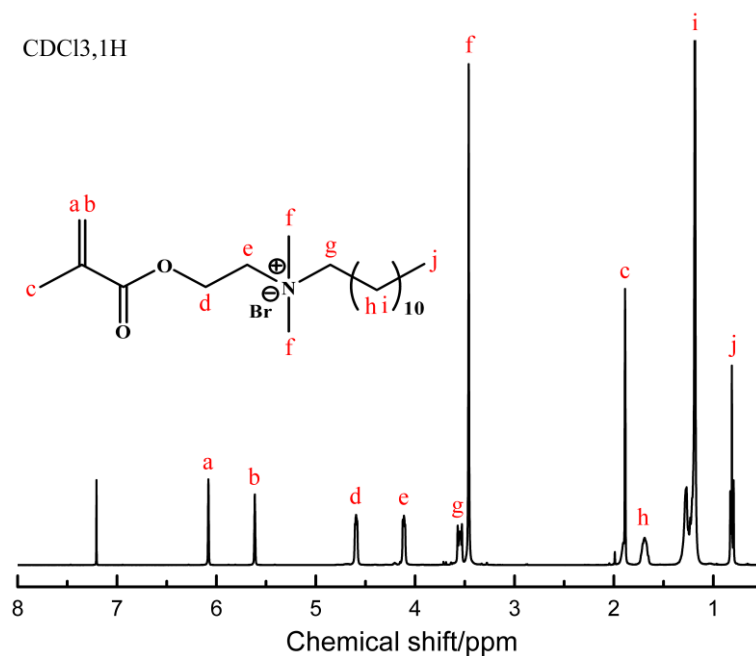

**Figure S2.**  $^1\text{H}$  NMR of C12 monomer.

## S2.2. Synthetic formulation of emulsion for the control sample

**Table S1.** The synthetic formulations of emulsions with different contents of QAS-BN.

| Sample  | MMA<br>(g) | BA<br>(g) | Reaction monomers |            |              |             | initiator<br>AIBA<br>(g) | Emulsifier  |               | Solvent<br>H <sub>2</sub> O<br>(g) |
|---------|------------|-----------|-------------------|------------|--------------|-------------|--------------------------|-------------|---------------|------------------------------------|
|         |            |           | C12<br>(g)        | C12<br>(g) | p-CMS<br>(g) | VTES<br>(g) |                          | CTAB<br>(g) | LCN407<br>(g) |                                    |
| CONTROL | 94.50      | 94.50     | 13.5              | 6.75       | 4.50         | 15.75       | 0.45                     | 2.8         | 4             | 275                                |

\*Mass ratio of QAS-BN or p-CMS to total monomer mass; \*The number in the sample name refers to the content of QAS-BN and p-CMS, for example.E-7B1p indicates that 7 wt.% and 1 wt.% of the total monomer content of QAS-BN and p-CMS are involved in the copolymerization reaction. .
